# Supplementary material for: Chronic postnatal chemogenetic activation of forebrain excitatory neurons evokes persistent changes in mood behavior
Source: eLife. 2020 Sep 21;9:e56171. doi: 10.7554/eLife.56171 (PMC7652419; doi:10.7554/eLife.56171)
Supplement: Figure 2—source data 1. [file elife-56171-fig2-data1.xlsx]

## Sheet: OFT
Percent distance in center			Percent time spent in center			number of entries to center			Total distance travelled (cm)
Vehicle	PNCNO		Vehicle	PNCNO		Vehicle	PNCNO		Vehicle	PNCNO
21.105	27.9006		11.8467	21.52		47	78		3219.27	4243.74
28.119	24.3288		19.6	22.2667		73	82		4131.59	3563.7
27.1738	20.9197		21.56	9.6		47	40		3106.23	3341.52
21.9312	10.9215		14.5067	5.4		60	24		4244.24	2391.05
24.9275	19.5632		17.3333	10.3533		32	30		2578.57	2572.27
19.623	22.0354		11.7933	16.9733		60	39		4727.16	2623.28
38.9894	18.6153		36.1467	9.54		97	30		4630.93	2684.9
36.3162	15.6059		43.32	8.84		60	37		3077.69	2240.78
34.3316	32.0112		32.84	28		78	63		4257.6	3131.97
25.2991	20.12		20.5467	20.2067		75	38		4117.9	2875.47
30.3093	33.2849		29.62	38.1467		72	65		3601.27	3329.86
26.4778	30.9821		22.4467	30.2		71	76		4399.08	3751.55
36.2214	24.8553		30.76	18.36		93	63		4852.21	4044.33
19.7863	20.4106		16.0333	15.0267		56	39		3549.58	2748.74
24.9351	14.0425		18.6733	8.31333		55	36		3285.85	2393.46

## Sheet: EPM
Percent distance in travelled in open arms			Percent time spent in open arms			number of entries to open arms			Total distance travelled (cm)
Vehicle	PNCNO		Vehicle	PNCNO		Vehicle	PNCNO		Vehicle	PNCNO
40.1054	33.6514		46.6133	41.24		25	23		2256.98	2289.81
29.6284	15.1877		34.7733	18.2		17	17		2003.25	2260.34
33.2098	16.0953		37.3	15.6533		24	13		2106.68	2253.6
31.4088	16.7254		34.62	17.6333		21	18		2955.1	2602.27
39.9496	29.6478		44.86	32.2467		17	25		2239.89	2750.47
39.5893	36.885		50.38	41.7867		24	32		2269.66	2876.32
32.129	41.9929		43.98	46.5667		34	20		2419.33	1814.43
31.3689	37.7732		31.58	40.0733		24	16		2294.72	1451.15
30.7344	26.9782		36.7	34.4267		30	10		3102.54	1275.96
32.866	9.50825		45.5933	8.94667		26	9		2197.88	1666.91
28.6092	29.1022		31.78	33.04		25	20		2214.77	2414.06
27.5712	32.6028		29.46	32.2733		24	31		2229.77	2603.81
18.0977	15.6211		20.3867	18.3733		22	15		2513.46	2521.45
27.1149	9.48805		23.9733	7.35333		20	6		1908.68	911.751
18.0943	36.1968		23.9533	39.0733		29	26		3386.14	2614.35

## Sheet: LD Box
Number of entries to the light box			Time spent in the light box (s)
Vehicle	PNCNO		Vehicle	PNCNO
12	7		264	112
12	13		82.2	215
12	8		141.3	52
11	12		108	203
23	13		42	139
16	17		235	215
10	8		242	122
10	2		118	38.7
22	4		176	42.7
14	15		162	199
13	14		210.7	148
9	13		125.5	153
12	6		294	77
7	1		129.4	59
12	9		255	99

## Sheet: FST
Time spent immobile (s)
Vehicle	PNCNO
44.1	67.1
30.1	83.7
28.4	8.9
4.8	12.8
0	80.9
79.4	45.1
11.9	86.8
4.9	9.4
29.2	3.6
14.41	43.8
15.6	139.1
2.4	45.56
31.7	220.41
