# Supplementary material for: Chronic postnatal chemogenetic activation of forebrain excitatory neurons evokes persistent changes in mood behavior
Source: eLife. 2020 Sep 21;9:e56171. doi: 10.7554/eLife.56171 (PMC7652419; doi:10.7554/eLife.56171)
Supplement: Figure 3—source data 1. [file elife-56171-fig3-data1.xlsx]

## Sheet: OFT
Percent distance in center			Percent time spent in center			Percent distance in center			Percent time spent in center
Vehicle	JCNO		Vehicle	JCNO		Vehicle	ACNO		Vehicle	ACNO
8.03163	0.960423		7.31333	0.906667		28.4391	11.0914		21.88	0.906667
14.4579	7.48198		13.9067	13.1133		22.4819	15.8901		10.2467	9.18
0.160386	23.0367		0.113333	17.6733		16.5709	28.4252		13.2	24.36
15.3853	26.5289		15.0133	22.4133		15.2854	13.1067		6.54667	4.06
14.7113	32.8193		12.58	18.44		27.2713	26.1058		22.94	22.6
13.0658	17.1648		12.22	15.9467		20.9844	19.8558		14.44	16.0933
16.7187	6.17227		28.76	13.9867		20.2332	10.9247		9.36	2.61333
9.82899	7.59621		9.3	9.53333			21.2752			14.96
21.3021			11.0733				12.1172			2.40667
7.93805			13.3867				13.1964			5.03333
13.0892			10.42				9.32198			5.16667

## Sheet: EPM
Percent distance in travelled in open arms			Percent time spent in open arms			Percent distance in travelled in open arms			Percent time spent in open arms
Vehicle	JCNO		Vehicle	JCNO		Vehicle	ACNO		Vehicle	ACNO
24.0941	9.40462		27.9333	13.9867		4.31867	5.26223		3.92667	11.4467
6.61068	13.2776		6.96667	15.92		7.82926	8.39245		7.40667	10.6867
9.70776	3.81088		9.51333	4.4		3.7789	0.440304		4.23333	0.253333
23.8345	12.742		35.66	12.32		19.9745	11.7827		14.4067	13.1733
34.6222	29.7522		35.02	40.82		10.0772	5.55176		10.78	2.83333
22.2162	26.8899		23.9133	31.0933		18.0569	20.5255		18.2067	9.36667
2.88505	16.9463		3.42667	16.4267		5.05495	13.647		2.9	12.0533
42.3959	19.3543		50.1533	23.9			8.55328			8.43333
18.1559	25.88		25.6667	30.94			39.7981			27.12
8.41021	25.0946		6.37333	29.1867			9.37023			10.6333
6.93033			8.86667				15.2514			13.6867

## Sheet: LD Box
Number of entries to the light box			Time spent in the light box (s)			Number of entries to the light box			Time spent in the light box (s)
Vehicle	JCNO		Vehicle	JCNO		Vehicle	ACNO		Vehicle	ACNO
32	7		119.8	19		7	4		31.42	23.72
34	28		115.04	180.84		4	12		14.61	78
21	36		352.88	133.88		2	13		13.58	66
39	52		272.68	332		2	7		18.03	24.82
26	33		112.2	255.36		9	5		60.3	26.04
19	41		137.84	177.24		25	13		159	70.99
13	18		66.92	123.6		26	15		213	112
13	31		28	121.88			22			143
32	15		90.96	74.32			1			3.53
21	32		119.24	130.08			2			6.94
16			89.08				4			37.5

## Sheet: FST
Time spent immobile (s)			Time spent immobile (s)
Vehicle	JCNO		Vehicle	ACNO
37	164		16.36	23.35
150	115		22.31	30.64
154	82		20.16	12.41
136	143		27.35	11.95
56	110		34.03	29.24
55	203		31.09	15.08
21	63		11.89	36.87
166	140		27.56	16.62
83	136		39.54	20.77
164	115		35.23
19	210
