# Supplementary material for: Chronic postnatal chemogenetic activation of forebrain excitatory neurons evokes persistent changes in mood behavior
Source: eLife. 2020 Sep 21;9:e56171. doi: 10.7554/eLife.56171 (PMC7652419; doi:10.7554/eLife.56171)
Supplement: Figure 6—source data 1. [file elife-56171-fig6-data1.xlsx]

## Sheet: Sheet1
			Genes	Forward Primer (5'-3')	Reverse Primer (5'-3')
			c-Fos	AGGGAGCTGACAGATACACTCC	TGCAACGCAGACTTCTCATC
			Erk1	GCCACCTTCTCTCACTTTGC	TGTCAGGGAAAATGGGGTGG
			Nr4a1	GGGTGACCCCACTATTTGTC	ATGGAAGGAGAGCGGAAGAG
			Npas4	CCTTCCAGACTCACTTGCCC	CTGAGCTTTCTGTCAACTGTCC
			JunB	ATCAGCTACCTCCCACATGC	GCTTTCGCTCCACTTTGATG
			Staufen1	CAGACAGCCCCGGATTATGG	TGCCCAACCTTTACCTGCAT
			Staufen2	GTGGCCCGCAGTTTTGTG	CAACAGCTTGTTGGGCCTTC
			Nrxn1	ATTGGACACGCTATGGTGACA	ACTGACTGGTGACCCTGGAA
			Gphn	TGGGTGGGACTATATCGGCA	TTTGTGGCCTCTGGAGTGAC
			Shank	ACCAGGTCCCATAAGGCTACA	TTCAGGCATACACAGGCACC
			Nlgn1	GCTTGGGGTACTTGGCTTCT	AGGTTGACACATGAACCCCC
			Nlgn2	ACTTCGCCAAGACTGGTGAC	ACCTTGTTGGCACGGTAGTT
			Psd95	TAGTGACAACCAAGAAATACCGC	TCCGTTCACCTGCAACTCATA
			Fmrp	CAAGGCTTGGCAGGGTATGG	CCAATTTGTCGCAACTGCTCA
			Mecp2	AAACAGCGGCGCTCCATTA	AAAGCTTTTCCCTGGGGATTGA
			Mef2c	CAACAAAGCCCTCAGCAGGT	TGCATTCGTTCCCTCTGCAC
			Synapsin1b	TACCATCCACCAAGCAGTCC	TGGAGGTTGGAGGAAGATGC
