# Supplementary material for: Chronic postnatal chemogenetic activation of forebrain excitatory neurons evokes persistent changes in mood behavior
Source: eLife. 2020 Sep 21;9:e56171. doi: 10.7554/eLife.56171 (PMC7652419; doi:10.7554/eLife.56171)
Supplement: Source data 1. [file elife-56171-data1.xlsx]

## Sheet: Sheet1
n = sample number (applicable to electrophysiology experiments); N = number of animals
Figure number	Nature of experiment/statistical test	Figure detail	F value	DFn	Dfd	F-test P value	t	df	p value	n (Vehicle)	N (Vehicle)	n (CNO)	N (CNO)	D-Value: For K-S in case needed
Figure 1	Western Blot densitometry/ Student's t-test	G	5.872	3	3	0.18	2.966	6	0.0251		4		4
	Western Blot densitometry/ Student's t-test	H	7.48	3	3	0.1325	4.995	6	0.0025		4		4
	Western Blot densitometry/ Student's t-test	I	8.462	3	3	0.1129	2.123	6	0.0779		4		4
	Western Blot densitometry/ Student's t-test	J	5.608	3	3	0.1906	10.3	6	<0.0001		4		4
	Electrophysiology/2-sample Kolmogorov-Smirnov tests	Q								7	3	10	4	0.0992
	Electrophysiology/2-sample Kolmogorov-Smirnov tests	R								7	3	10	4	0.1162
	Electrophysiology/2-sample Kolmogorov-Smirnov tests	S								6	3	8	4	0.2885
	Electrophysiology/2-sample Kolmogorov-Smirnov tests	T								6	3	8	4	0.2347
Figure 1-Supplement 2	Western Blot densitometry/ Student's t-test	C	1.557	3	3	0.725	2.567	6	0.0425
	Western Blot densitometry/ Student's t-test	D	1.069	3	3	0.9578	8.798	6	0.0001
Figure 1-Supplement 3	Electrophysiology/2-sample Kolmogorov-Smirnov tests	C								7	3	10	4	0.2531
	Electrophysiology/2-sample Kolmogorov-Smirnov tests	D								7	3	10	4	0.1062
	Electrophysiology/2-sample Kolmogorov-Smirnov tests	F	0.1743	1	6	L.R.	Calculated for slope		0.6908	6	3	9	4
Figure 1-Table 1		All								6	3	9	4
	Electrophysiology/Student's t-test	RMP*	1.862	5	8	0.4143	2.052	13	0.06	6	3	9	4
Figure 2	Behavior/ Student's t-test	C	1.097	14	14	0.8656	2.269	28	0.0312		15		15
	Behavior/ Student's t-test	D	1.005	14	14	0.9928	1.641	28	0.112		15		15
	Behavior/ Student's t-test	E	1.272	14	14	0.6586	2.329	28	0.0273		15		15
	Behavior/ Student's t-test	F	1.23	14	14	0.7039	3.26	28	0.0029		15		15
	Behavior/ Student's t-test	H	2.767	14	14	0.0668	1.468	28	0.1532		15		15
	Behavior/ Student's t-test	I	1.977	14	14	0.2147	1.784	28	0.0852		15		15
	Behavior/ Student's t-test	J	2.829	14	14	0.0613	2.333	28	0.027		15		15
	Behavior/ Student's t-test	K	1.998	14	14	0.2076	1.352	28	0.1872		15		15
	Behavior/ Student's t-test	M	1.229	14	14	0.7054	2.087	28	0.0461		15		15
	Behavior/ Student's t-test	N	1.378	14	14	0.5567	1.876	28	0.0711		15		15
	Behavior/ Student's t-test	P	7.862	12	12	0.0012	2.356	15	0.0325		13		13
Figure 2-Supplement 1	Weight analysis/ Student's t-test	B	P2= 1.543, P3=1.4, P4=1.207, P5=1.438, P6=1.386, P7=1.179, P8=1.025, P9=1.045, P10=1.025, P11=1.012, P12=1.025, P13=1.048, P14=1.004	P2=8, P3= 8, P4=8, P5=8, P6=8, P7=8, P8=10, P9=8, P10=8, P11=8, P12=8, P13=8, P14=7	P2=10, P3=10, P4=10, P5=10, P6=10, P7=10, P8=8, P9=10, P10=10, P11=10, P12=10, P13=10, P14=8	P2=0.5112, P3=0.6064, P4=0.7654, P5=0.5794, P6=0.6168, P7=0.7912, P8=0.9918, P9=0.9294, P10=0.9509, P11=0.9665, P12=0.9511, P13=0.9254, P14=0.9826	P2=0.2887, P3=0.8357, P4=0.1837, P5=0.3307, P6=0.4767, P7=0.08273, P8=0.2726, P9=0.2501, P10=0.3203, P11=0.3560, P12=0.4144, P13=0.3335, P14=0.4946	P2=18, P3=18, P4=18, P5=18, P6=18, P7=18, P8=18, P9=18, P10=18, P11=18, P12=18, P13=18, P14=15	P2=0.7761, P3=0.4143, P4=0.8563, P5=0.7447, P6=0.6393, P7=0.9350, P8=0.7882, P9=0.8053, P10= 0.7525, P11=0.7250, P12=0.6834, P13=0.7426, P14=0.9612		P2-P13=9, P14= 8		P2-P13=11, P14= 9
	Weight analysis/ Student's t-test	C	3.524	8	10	0.0663	1.237	18	0.232		9		11
Figure 2-Supplement 2	Behavior/ Student's t-test	B	P9=2.657, P12=1.032	P9=9, P12=15	P9=10, P12=11	P9=0.1440, P12=0.9795	P9=1.047, P12=1.094	P9=19, P12=26	P9=0.3083, P12=0.2839		P9=10, P12=12		P9=11, P12=16
	Behavior/ Student's t-test	C	P9=2.936, P12=3.274	P9=18, P12=11	P9=11, P12=15	P9=0.0725, P12=0.0353	P9=0.6709, P12=0.7725	P9=29, P12=16	P9=0.5076, P12=0.4511		P9=12, P12=12		19,16
Figure 2-Supplement 3	Behavior/ Student's t-test	C	1.438	10	10	0.5765	2.824	20	0.0105		11		11
	Behavior/ Student's t-test	D	1.369	10	10	0.6291	1.59	20	0.1274		11		11
	Behavior/ Student's t-test	E	1.158	10	10	0.8211	2.919	20	0.0085		11		11
	Behavior/ Student's t-test	F	1.312	10	10	0.6761	1.317	20	0.2027		11		11
	Behavior/ Student's t-test	H	3.139	10	10	0.0853	2.105	20	0.0481		11		11
	Behavior/ Student's t-test	I	2.31	10	10	0.201	3.219	20	0.0043		11		11
	Behavior/ Student's t-test	J	2.207	10	10	0.2279	0.4313	20	0.6709		11		11
	Behavior/ Student's t-test	K	1.468	10	10	0.5553	0.8419	20	0.4099		11		11
	Behavior/ Student's t-test	M	1.783	10	10	0.3755	2.034	20	0.0555		11		11
	Behavior/ Student's t-test	N	1.169	10	10	0.8097	0.7554	20	0.4588		11		11
	Behavior/ Student's t-test	P	1.509	10	10	0.4797	1.191	23	0.2458		14		11
Figure 2-Supplement 4	Behavior/ Student's t-test	C	1.935	11	11	0.2887	0.7191	22	0.4796		12		12
Figure 2-Supplement 5	Behavior/ Student's t-test	C	1.509	12	10	0.5225	0.474	22	0.6402		13		11
	Behavior/ Student's t-test	D	1.431	12	10	0.5784	1.391	22	0.178		13		11
	Behavior/ Student's t-test	E	7.772	10	12	0.0015	1.239	12.18	0.287		13		11
	Behavior/ Student's t-test	F	1.372	12	10	0.6251	2.313	22	0.0304		13		11
	Behavior/ Student's t-test	H	1.145	13	12	0.8203	1.044	25	0.3065		13		14
	Behavior/ Student's t-test	I	1.161	13	12	0.8018	1.118	25	0.2744		13		14
	Behavior/ Student's t-test	J	1.278	13	12	0.6775	1.548	25	0.1342		13		14
	Behavior/ Student's t-test	K	1.262	12	13	0.6809	0.8297	25	0.4145		13		14
	Behavior/ Student's t-test	M	1.377	13	12	0.5867	0.662	25	0.514		13		14
	Behavior/ Student's t-test	N	2.144	13	12	0.1966	0.3843	25	0.704		13		14
	Behavior/ Student's t-test	P	3.149	11	11	0.0698	0.3922	22	0.6987		12		12
Figure 2-Supplement 6	Behavior/ Student's t-test	C	1.932	11	11	0.2897	0.1085	22	0.9146		12		12
	Behavior/ Student's t-test	D	1.3	11	11	0.6709	0.6263	22	0.5376		12		12
	Behavior/ Student's t-test	E	1.183	11	11	0.7859	1.006	22	0.3251		12		12
	Behavior/ Student's t-test	F	1.167	11	11	0.8025	1.491	22	0.1502		12		12
	Behavior/ Student's t-test	H	1.37	11	11	0.6105	0.8707	22	0.3933		12		12
	Behavior/ Student's t-test	I	1.271	11	11	0.6975	1.058	22	0.3015		12		12
	Behavior/ Student's t-test	J	1.471	11	11	0.533	0.7183	22	0.4801		12		12
	Behavior/ Student's t-test	K	3.064	11	11	0.0764	1.14	22	0.2667		12		12
	Behavior/ Student's t-test	M	3.007	11	11	0.0813	0.7704	22	0.4492		12		12
	Behavior/ Student's t-test	N	1.71	11	11	0.3872	0.6827	22	0.5019		12		12
	Behavior/ Student's t-test	P	2.75	11	11	0.108	0.5103	22	0.6149		12		12
Figure 2-Supplement 7	Behavior/ Student's t-test	C	1.641	14	14	0.3652	1.394	28	0.1744		15		15
	Behavior/ Student's t-test	D	1.252	14	14	0.6803	2.367	28	0.0251		15		15
	Behavior/ Student's t-test	E	1.093	14	14	0.8697	1.17	28	0.252		15		15
	Behavior/ Student's t-test	F	1.181	14	14	0.7595	0.7451	28	0.4624		15		15
	Behavior/ Student's t-test	H	2.295	14	14	0.1322	3.289	28	0.0027		15		15
	Behavior/ Student's t-test	I	1.991	14	14	0.2099	3.318	28	0.0025		15		15
	Behavior/ Student's t-test	J	1.33	14	14	0.6007	0.4284	28	0.6718		15		15
	Behavior/ Student's t-test	K	1.273	14	14	0.6574	1.178	28	0.2486		15		15
Figure 3	Behavior/ Student's t-test	C	4.141	7	10	0.043	0.6824	9.47	0.5113		11		8
	Behavior/ Student's t-test	D	1.096	10	7	0.9322	0.5797	17	0.5698		11		8
	Behavior/ Student's t-test	F	2.195	10	9	0.2522	0.03063	19	0.9759		11		10
	Behavior/ Student's t-test	G	1.9	10	9	0.3486	0.1143	19	0.9102		11		10
	Behavior/ Student's t-test	H	2.141	9	10	0.2515	1.052	19	0.3062		11		10
	Behavior/ Student's t-test	I	1.119	10	9	0.8754	0.4517	19	0.6566		11		10
	Behavior/ Student's t-test	J	1.741	10	10	0.3952	1.765	20	0.0927		11		11
	Behavior/ Student's t-test	M	1.723	10	6	0.5221	1.777	16	0.0945		7		11
	Behavior/ Student's t-test	N	1.808	10	6	0.4838	1.168	16	0.2599		7		11
	Behavior/ Student's t-test	P	2.512	10	6	0.2717	0.6093	16	0.5509		7		11
	Behavior/ Student's t-test	Q	1.359	10	6	0.7347	0.6532	16	0.5229		7		11
	Behavior/ Student's t-test	R	2.531	6	10	0.1868	0.4544	16	0.6557		7		11
	Behavior/ Student's t-test	S	3.257	6	10	0.0966	0.648	16	0.5262		7		11
	Behavior/ Student's t-test	T	1.001	9	8	1	1.153	17	0.2648		10		9
Figure 3-Supplement 1	Behavior/ Student's t-test	B	4.147	7	10	0.0428	0.4549	9.467	0.6595		11		10
	Behavior/ Student's t-test	C	2.936	7	10	0.1202	0.6452	17	0.5274		11		8
	Behavior/ Student's t-test	D	2.16	10	9	0.2618	0.9741	19	0.3422		11		10
	Behavior/ Student's t-test	E	1.252	10	9	0.7459	0.9793	19	0.3397		11		10
	Behavior/ Student's t-test	G	1.333	6	10	0.655	1.633	16	0.122		7		11
	Behavior/ Student's t-test	H	1.302	6	10	0.6783	0.9251	16	0.3687		7		11
	Behavior/ Student's t-test	I	1.673	10	6	0.546	0.5779	16	0.5744		7		11
	Behavior/ Student's t-test	J	2.239	10	6	0.3361	0.07641	16	0.94		7		11
Figure 3-Supplement 2	Behavior/ Student's t-test	C	1.519	10	10	0.5203	0.2238	20	0.5858		11		11
	Behavior/ Student's t-test	D	2.973	10	10	0.1006	1.237	20	0.2305		11		11
	Behavior/ Student's t-test	E	1.103	10	10	0.8763	0.4879	20	0.6309		11		11
	Behavior/ Student's t-test	F	1.668	10	10	0.4327	1.105	20	0.2824		11		11
	Behavior/ Student's t-test	H	1.52	10	10	0.5203	0.5379	20	0.5966		11		11
	Behavior/ Student's t-test	I	1.117	10	10	0.8642	0.2258	20	0.8236		11		11
	Behavior/ Student's t-test	J	1.831	10	10	0.3542	0.2248	20	0.8244		11		11
	Behavior/ Student's t-test	K	1.559	10	10	0.4951	0.4546	20	0.6543		11		11
	Behavior/ Student's t-test	M	1.936	10	10	0.3123	0.509	20	0.6164		11		11
	Behavior/ Student's t-test	N	3.394	10	10	0.067	0.4224	20	0.6758		11		11
Figure 4	Behavior/ Student's t-test	C	3.039	11	11	0.0785	1.69	22	0.1052		12		12
	Behavior/ Student's t-test	D	69dB (+4dB)=2.063, 73dB (+8dB)=1.136, 81dB (+16dB)=2.924	69dB (+4dB)=10, 73dB (+8dB)=10, 81dB (+16dB)=11	69dB (+4dB)=9, 73dB (+8dB)=11, 81dB (+16dB)=11	69dB (+4dB)=0.2910, 73dB (+8dB)=0.8324, 81dB (+16dB)=0.0889	69dB (+4dB)=2.213, 73dB (+8dB)=2.266, 81dB (+16dB)=2.169	69dB (+4dB)=19, 73dB (+8dB)=21, 81dB (+16dB)=22	69dB (+4dB)=0.024, 73dB (+8dB)=0.017, 81dB (+16dB)=0.041		12		12
Figure 4-Supplement 1	Behavior/ Student's t-test	C	1.669	8	7	0.5135	0.4139	15	0.6848		8		9
	Behavior/ Student's t-test	D	69dB (+4dB)=1.282, 73dB (+8dB)=1.659, 81dB (+16dB)=2.115	69dB (+4dB)=7, 73dB (+8dB)=8, 81dB (+16dB)=8	69dB (+4dB)=8, 73dB (+8dB)=8, 81dB (+16dB)=7	69dB (+4dB)=0.7296, 73dB (+8dB)=0.5188, 81dB (+16dB)=0.3395	69dB (+4dB)=0.7376,, 73dB (+8dB)=1.412, 81dB (+16dB)=1.279	69dB (+4dB)=15, 73dB (+8dB)=15, 81dB (+16dB)=15	69dB (+4dB)=0.4722, 73dB (+8dB)= 0.1783, 81dB (+16dB)=0.2203		8		9
Figure 4-Supplement 2	Behavior/ Student's t-test	C	1.094	9	9	0.8952	1.671	18	0.112		10		10
	Behavior/ Student's t-test	D	69dB (+4dB)=1.922, 73dB (+8dB)=1.573, 81dB (+16dB)=2.208	69dB (+4dB)=9, 73dB (+8dB)=9, 81dB (+16dB)=9	69dB (+4dB)=9, 73dB (+8dB)=9, 81dB (+16dB)=9	69dB (+4dB)=0.3444, 73dB (+8dB)=0.5106, 81dB (+16dB)=0.2536	69dB (+4dB)=0.8414, 73dB (+8dB)=0.7893, 81dB (+16dB)=0.1342	69dB (+4dB)=18, 73dB (+8dB)=18, 81dB (+16dB)=18	69dB (+4dB)=0.4109, 73dB (+8dB)=0.4402, 81dB (+16dB)=0.8947		10		10
Figure 5	NMR/Student's t-test	B	1.335	6	6	0.7349	2.115	12	0.05		7		7
	NMR/Student's t-test	C	1.088	6	6	0.9212	0.5582	12	0.587		7		7
	NMR/Student's t-test	D	1.755	6	6	0.5111	1.724	12	0.1104		7		7
	NMR/Student's t-test	E	2.4	6	6	0.3108	2.206	12	0.045		7		7
	NMR/Student's t-test	F	2.043	6	6	0.4059	1.78	12	0.1004		7		7
	NMR/Student's t-test	G	1.105	6	6	0.9064	2.905	12	0.001		7		7
	NMR/Student's t-test	H	1.277	6	6	0.7739	2.116	12	0.05		7		7
	NMR/Student's t-test	I	2.609	6	6	0.2682	3.19	12	0.009		7		7
	NMR/Student's t-test	J	1.833	6	6	0.4796	2.567	12	0.026		7		7
	NMR/Student's t-test	K	2.167	6	6	0.3691	3.28	12	0.0066		7		7
	NMR/Student's t-test	L	2.521	6	6	0.2852	1.874	12	0.0854		7		7
	NMR/Student's t-test	M	1.133	6	6	0.8838	1.59	12	0.1378		7		7
	NMR/Student's t-test	N	1.523	6	6	0.6222	2.014	12	0.067		7		7
	NMR/Student's t-test	O	1.884	6	6	0.4604	2.978	12	0.0115		7		7
Figure 5-Supplement 3	NMR/Student's t-test	B	2.115	6	6	0.3839	0.9623	12	0.3549		7		7
	NMR/Student's t-test	C	1.233	6	6	0.8055	1.987	12	0.0702		7		7
	NMR/Student's t-test	D	1.603	6	6	0.5811	2.262	12	0.043		7		7
	NMR/Student's t-test	E	1.317	6	6	0.7465	1.688	12	0.1172		7		7
Figure 6	Cell count/Student's t-test	C	3.154	9	11	0.0765	3.258	20	0.0039		10		12
	Cell count/Student's t-test	D	1.67	9	11	0.7955	2.765	20	0.0119		10		12
	Cell count/Student's t-test	E	8.509	9	11	0.0016	1.66	10.76	0.1256		10		12
	Cell count/Student's t-test	F	1.369	11	9	0.6479	0.6248	20	0.5392		10		12
Figure 7	Electrophysiology/2-sample Kolmogorov-Smirnov tests	C							< 0.0001	8	3	5	2	0.1015
	Electrophysiology/2-sample Kolmogorov-Smirnov tests	D							< 0.0001	8	3	5	2	0.2029
	Electrophysiology/2-sample Kolmogorov-Smirnov tests	F							< 0.0001	5	3	6	4	0.1487
	Electrophysiology/2-sample Kolmogorov-Smirnov tests	G							0.0255	5	3	6	4	0.0559
	Electrophysiology/2-sample Kolmogorov-Smirnov tests	I							< 0.0001	8	4	7	4	0.1571
	Electrophysiology/2-sample Kolmogorov-Smirnov tests	J							< 0.0001	8	4	7	4	0.2274
	Electrophysiology/2-sample Kolmogorov-Smirnov tests	L							< 0.0001	6	3	7	2	0.2729
	Electrophysiology/2-sample Kolmogorov-Smirnov tests	M							0.1424	6	3	7	2	0.0596
Figure 7-Supplement 1	Electrophysiology/2-sample Kolmogorov-Smirnov tests	C	0.0275	1	6	L.R.	Calculated for slope		0.8737	18	7	25	9
	Electrophysiology/2-sample Kolmogorov-Smirnov tests	E							< 0.0001	8	3	6	4	0.1449
	Electrophysiology/2-sample Kolmogorov-Smirnov tests	F							0.0009	8	3	6	4	0.0624
Figure 7-Supplement 2	Electrophysiology/2-sample Kolmogorov-Smirnov tests	C								8	3	6	4
	Electrophysiology/2-sample Kolmogorov-Smirnov tests	D								8	3	6	4
